# Supplementary material
Source: PubMed Central journal article supplement (PMC5373343)
Supplement: pnas.1701219114.sapp.pdf [file pnas.1701219114.sapp.pdf]

## Supplemental figures

| <b>Name</b>                          | <b>Mutations</b>                                                                                               | <b>Selection</b>                           |
|--------------------------------------|----------------------------------------------------------------------------------------------------------------|--------------------------------------------|
| Triple <sup>APC<sup>WT</sup></sup>   | <i>KRAS</i> <sup>G12D</sup> , <i>P53</i> <sup>KO</sup> , <i>SMAD4</i> <sup>KO</sup>                            | -EGF, +nutlin-3, -noggin                   |
| Triple <sup>P53<sup>WT</sup></sup>   | <i>KRAS</i> <sup>G12D</sup> , <i>APC</i> <sup>KO</sup> , <i>SMAD4</i> <sup>KO</sup>                            | -EGF, -Wnt, -R-spondin, -noggin            |
| Triple <sup>SMAD4<sup>WT</sup></sup> | <i>KRAS</i> <sup>G12D</sup> , <i>APC</i> <sup>KO</sup> , <i>P53</i> <sup>KO</sup>                              | -EGF, -Wnt, -R-spondin, +nutlin-3          |
| Triple <sup>KRAS<sup>WT</sup></sup>  | <i>APC</i> <sup>KO</sup> , <i>P53</i> <sup>KO</sup> , <i>SMAD4</i> <sup>KO</sup>                               | -Wnt, -R-spondin, +nutlin-3, -noggin       |
| Quadruple                            | <i>KRAS</i> <sup>G12D</sup> , <i>APC</i> <sup>KO</sup> , <i>P53</i> <sup>KO</sup> , <i>SMAD4</i> <sup>KO</sup> | -EGF, -Wnt, -R-spondin, +nutlin-3, -noggin |

**Table S1.** Overview of the generated mutants and the functional selection strategies used to select. The first column depicts the names of the mutants as used throughout the manuscript.

| SAMPLE                  | CHR              | POS       | ID               | MUT             | VAF               | TYPE                                   | GENE             | ENSEMBL_ID      | AA_CHANGE       |              |
|-------------------------|------------------|-----------|------------------|-----------------|-------------------|----------------------------------------|------------------|-----------------|-----------------|--------------|
| Quadruple<br>t=0        | 1                | 79107484  | 1:79107484_C/A   | C>A             | 0.333333333333333 | missense_variant                       | IFI44L           | ENSG00000137959 | p.Pro450His     |              |
|                         | 2                | 27804714  | 2:27804714_T/C   | T>C             | 0.230769230769231 | missense_variant                       | C2orf16          | ENSG00000221843 | p.Cys1759Arg    |              |
|                         | 2                | 241696797 | COSM5085335      | C>T             | 0.08              | missense_variant                       | KIF1A            | ENSG00000130294 | p.Ala933Thr     |              |
|                         | 4                | 48996643  | 4:48996643_C/A   | C>A             | 0.4375            | missense_variant                       | CWH43            | ENSG00000109182 | p.Asp173Glu     |              |
|                         | 6                | 30917809  | COSM4528845      | G>A             | 0.1875            | missense_variant                       | DPCR1            | ENSG00000168631 | p.Gly523Glu     |              |
|                         | 7                | 45025698  | 7:45025698_T/G   | T>G             | 0.333333333333333 | splice_acceptor_variant&intron_variant | SNHG15           | ENSG00000232956 |                 |              |
|                         | 7                | 100349614 | COSM3831308      | T>C             | 0.222222222222222 | missense_variant                       | ZAN              | ENSG00000146839 | p.Leu629Pro     |              |
|                         | 12               | 50746243  | COSM940340       | T>G             | 0.333333333333333 | missense_variant                       | FAM186A          | ENSG00000185958 | p.Thr1458Pro    |              |
|                         | 12               | 116445443 | 12:116445443_T/A | T>A             | 0.333333333333333 | splice_acceptor_variant&intron_variant | MED13L           | ENSG00000123066 |                 |              |
|                         | Quadruple<br>t=4 | 1         | 79107484         | 1:79107484_C/A  | C>A               | 0.526315789473684                      | missense_variant | IFI44L          | ENSG00000137959 | p.Pro450His  |
|                         |                  | 4         | 48996643         | 4:48996643_C/A  | C>A               | 0.296296296296296                      | missense_variant | CWH43           | ENSG00000109182 | p.Asp173Glu  |
|                         |                  | 5         | 178552086        | COSM1721135     | T>G               | 0.227272727272727                      | missense_variant | ADAMTS2         | ENSG00000087116 | p.Asn949Thr  |
| 7                       |                  | 92099047  | COSM4386366      | A>G             | 0.130434782608696 | missense_variant                       | ERVW-1           | ENSG00000242950 | p.Ser217Pro     |              |
| 8                       |                  | 144378426 | 8:144378426_T/C  | T>C             | 0.318181818181818 | missense_variant                       | ZNF696           | ENSG00000185730 | p.Phe194Ser     |              |
| 9                       |                  | 117085613 | 9:117085613_G/C  | G>C             | 0.307692307692308 | missense_variant                       | ORM1             | ENSG00000229314 | p.Gly67Ala      |              |
| 11                      |                  | 1619423   | COSM4190294      | T>C             | 0.1875            | missense_variant                       | KRTAP5-2         | ENSG00000205867 | p.Ser20Gly      |              |
| 12                      |                  | 104378700 | 12:104378700_T/C | T>C             | 0.1               | splice_donor_variant&intron_variant    | TDG              | ENSG00000139372 |                 |              |
| 14                      |                  | 107083426 | 14:107083426_G/C | G>C             | 0.117647058823529 | missense_variant                       | IGHV4-59         | ENSG00000224373 | p.Pro60Ala      |              |
| 19                      |                  | 35863298  | 19:35863298_A/G  | A>G             | 0.2               | missense_variant                       | GPR42            | ENSG00000126251 | p.Asn346Ser     |              |
| 21                      |                  | 45994014  | COSM579461       | C>T             | 0.142857142857143 | missense_variant                       | KRTAP10-4        | ENSG00000215454 | p.Pro127Ser     |              |
| Quadruple<br>Metastasis |                  | 1         | 176709311        | 1:176709311_G/T | G>T               | 0.307692307692308                      | missense_variant | PAPPA2          | ENSG00000116183 | p.Gly1377Val |
|                         | 7                | 92099047  | COSM4386366      | A>G             | 0.14              | missense_variant                       | ERVW-1           | ENSG00000242950 | p.Ser217Pro     |              |
|                         | 9                | 72897347  | 9:72897347_A/C   | A>C             | 0.592592592592593 | missense_variant                       | SMC5             | ENSG00000198887 | p.Asn277His     |              |
|                         | 9                | 117085595 | 9:117085595_C/A  | C>A             | 0.272727272727273 | missense_variant                       | ORM1             | ENSG00000229314 | p.Ser61Tyr      |              |
|                         | 9                | 117085613 | 9:117085613_G/C  | G>C             | 0.363636363636364 | missense_variant                       | ORM1             | ENSG00000229314 | p.Gly67Ala      |              |
|                         | 14               | 77239560  | COSM958066       | C>A             | 0.46875           | missense_variant                       | VASH1            | ENSG00000071246 | p.Pro179His     |              |
|                         | 15               | 32921952  | 15:32921952_C/T  | C>T             | 0.101694915254237 | missense_variant                       | ARHGAP11A        | ENSG00000198826 | p.Thr365Ile     |              |
|                         | 19               | 35863298  | 19:35863298_A/G  | A>G             | 0.125             | missense_variant                       | GPR42            | ENSG00000126251 | p.Asn346Ser     |              |
|                         | 19               | 41743987  | COSM3892633      | C>T             | 0.441860465116279 | missense_variant                       | AXL              | ENSG00000167601 | p.Arg308Cys     |              |
|                         | 19               | 56663214  | 19:56663214_A/G  | A>G             | 0.269230769230769 | missense_variant                       | AC024580.1       | ENSG00000204533 | p.Ser13Pro      |              |
|                         | 21               | 45994014  | COSM579461       | C>T             | 0.25              | missense_variant                       | KRTAP10-4        | ENSG00000215454 | p.Pro127Ser     |              |

**Table S2.** Whole genome sequencing of quadruple mutant organoids and derived metastasis do not show subclonal outgrowth *in vitro* and *in vivo*. Missense, nonsense and splice site mutations are depicted in quadruple mutant cultures at the time it was transplanted, after it was kept in culture for 4 months and of a resulting metastasis. No common driver mutations were found and the identified mutations all have a relatively low variant allele frequency (VAF), suggesting that additional mutations in the cells were not responsible for the metastatic phenotype.

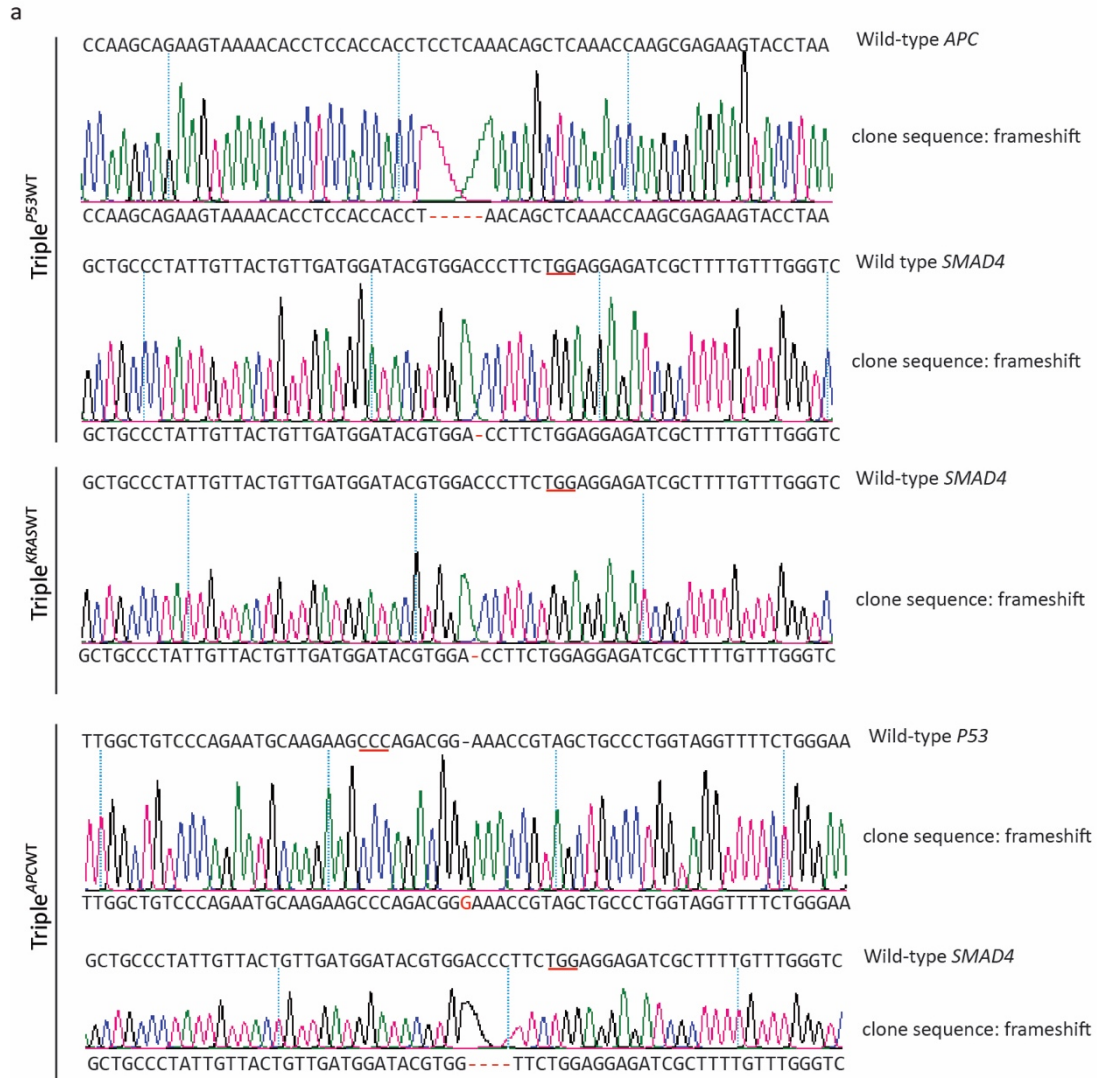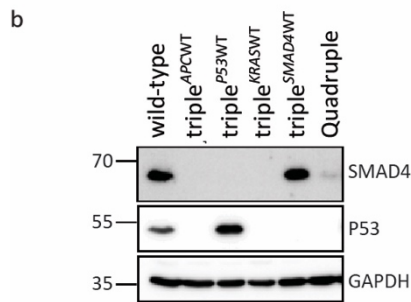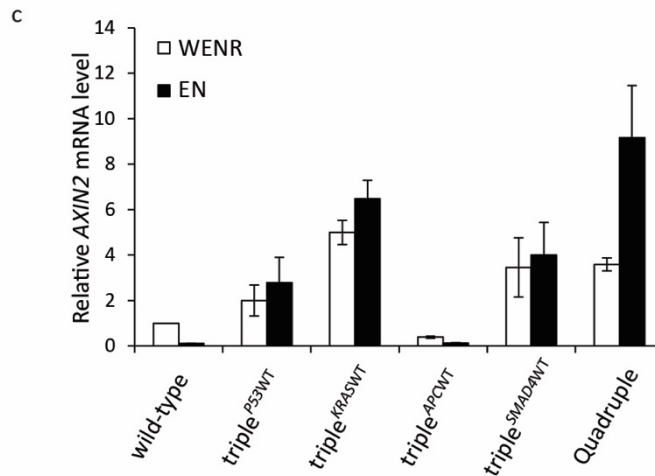

**Figure S1.** Generation of Triple<sup>KRASWT</sup>, Triple<sup>APCWT</sup> and Triple<sup>P53WT</sup> mutant human colon organoids using CRISPR/Cas9. **(A)** PCR amplification products of the mutated alleles of *P53* and *SMAD4* in Triple<sup>APCWT</sup>, *SMAD4* in Triple<sup>KRASWT</sup> and *APC* and *SMAD4* in Triple<sup>P53WT</sup>, were obtained using primers flanking the targeted exon (Drost et al., 2015). Subsequent sequencing revealed indels at the expected locations. PAM sequences are underlined in red in wild-type sequences. **(B)** Western blot analysis of SMAD4 and P53 expression in the indicated mutant human colon organoid lines, confirming the mutational status of the organoids. GAPDH, loading control. Please note the reduced SMAD4 expression in quadruple organoids, caused by the presence of a frameshift-inducing mutation in one allele and an in-frame deletion in the second allele (Drost et al., 2015). **(C)** Q-RT-PCR analysis for h*AXIN2* in the indicated organoid lines cultured in the presence (WENR) or absence (EN) of Wnt/R-spondin confirms inactivating mutations in *APC*. Expression was normalized to *GAPDH*. Mean and standard deviation of three independent experiments.

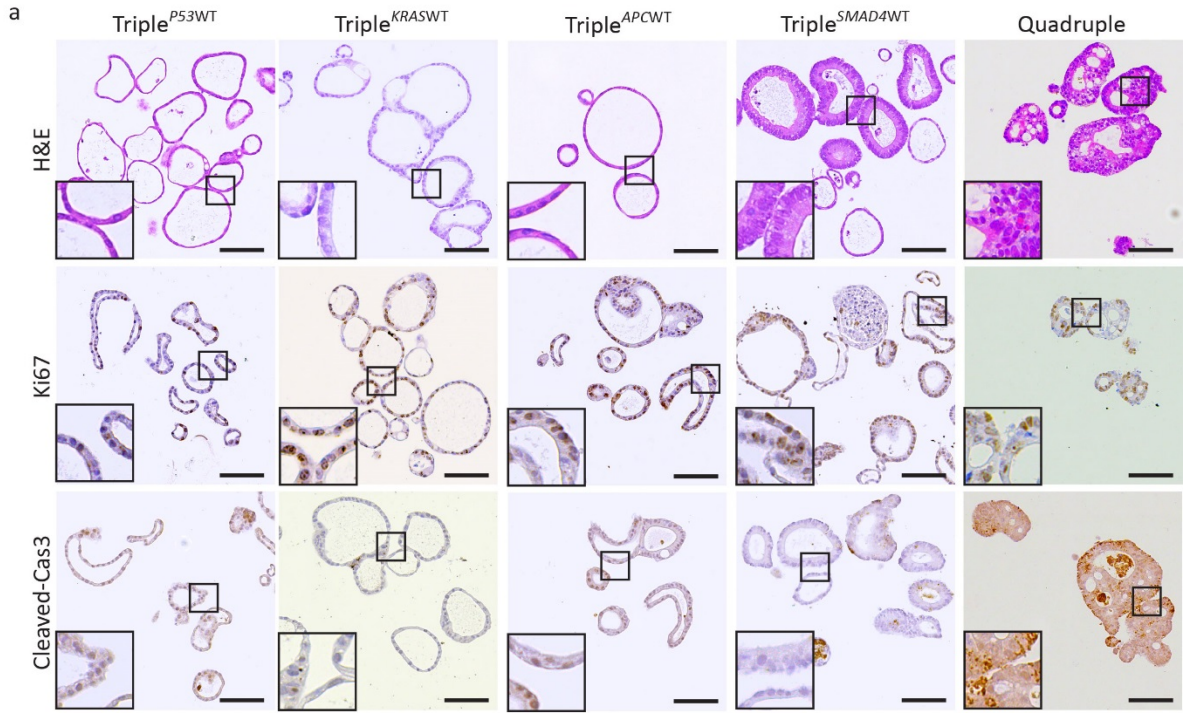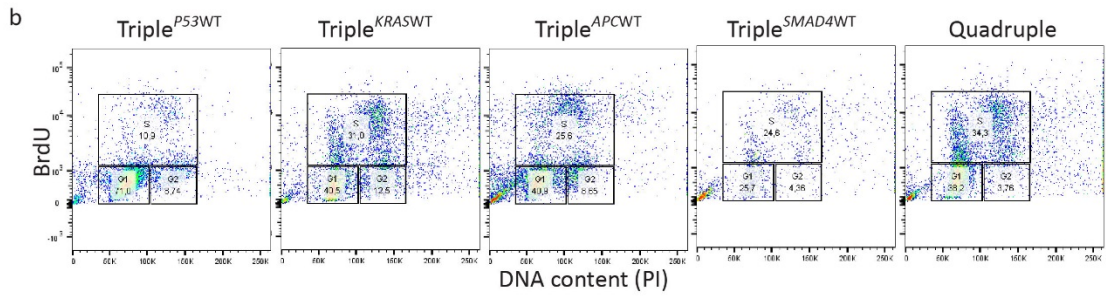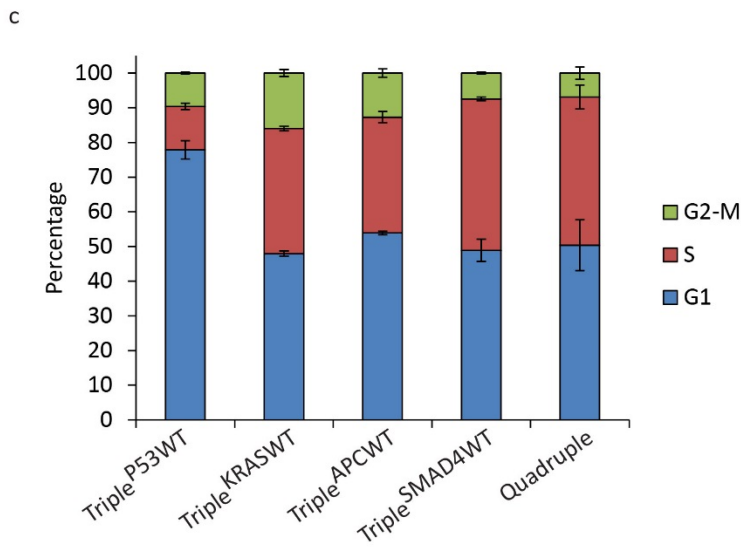

**Figure S2.** *In vitro* characterization of mutant human colon organoids. **(A)** Representative H&E (top), Ki-67 (middle) and cleaved caspase-3 (bottom) immunostainings on the indicated mutant human colon organoid lines. Scale bars 100  $\mu\text{m}$ . **(B)** Representative FACS plots of cell cycle profile analysis on the indicated mutant organoid lines. **(C)** Quantification of the cell cycle profile analysis in the indicated mutants. Represented are the percentages of cells in G1-, S- and G2/M-phase of the cell cycle. Average and SD of three independent experiments.

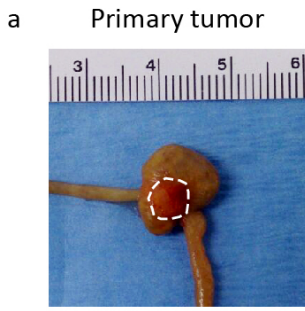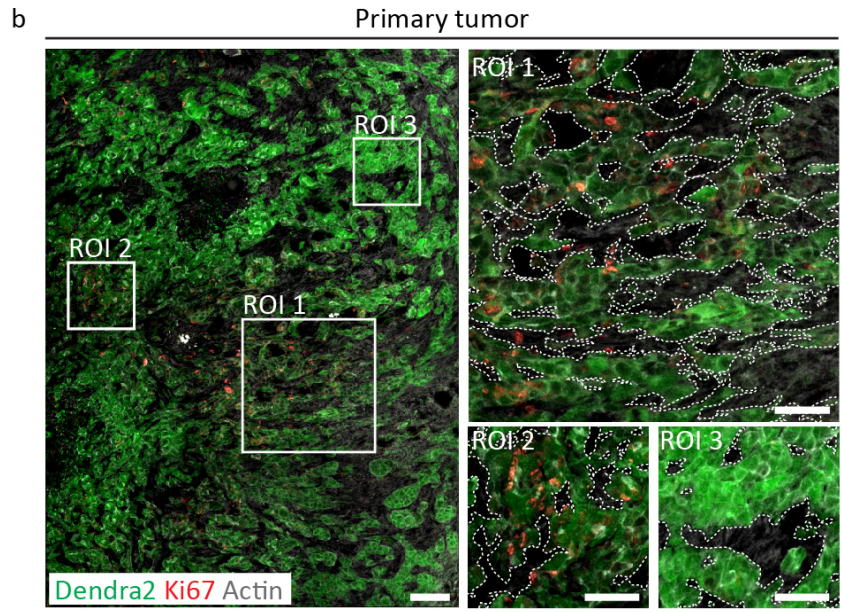



**Figure S3.** Development of an orthotopic intestinal organoid transplantation model to study CRC progression. **(A)** Representative picture of orthotopic primary tumor 8 weeks after organoid transplantation. Dashed lines highlight the tumor edges. **(B)** Immunofluorescence images of a primary tumor. The borders between tumors tissue and healthy tissue are indicated with a dotted line. Green represents tumor cells, red proliferative cells and gray all cells. Scale bars 100  $\mu\text{m}$ , except ROI images in b, where scale bars represent 50  $\mu\text{m}$ .

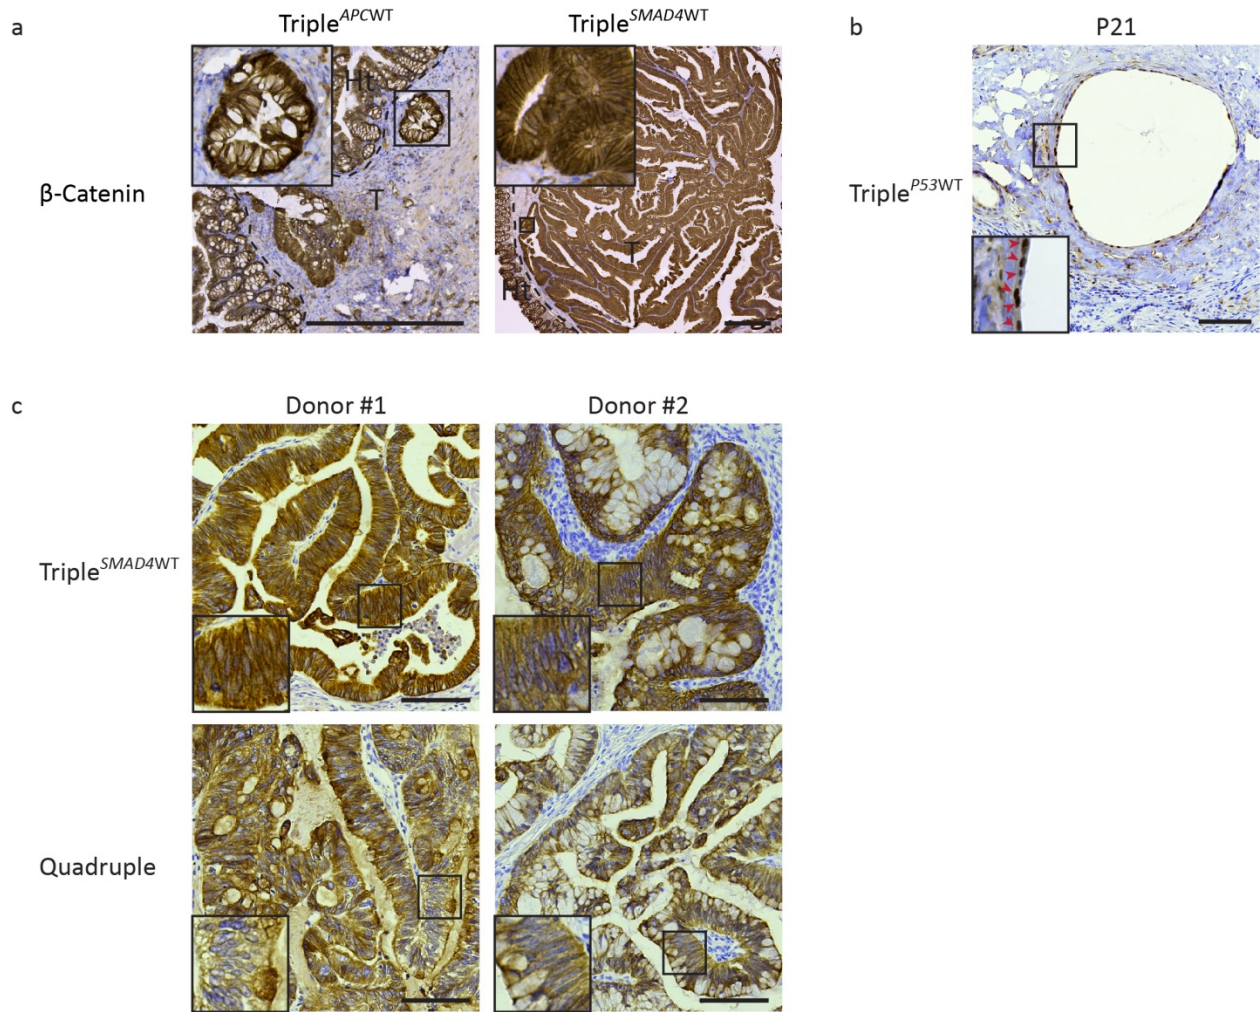

**Figure S4.** In-depth characterization of orthotopic human CRC. **(A)** β-Catenin staining on Triple<sup>APC</sup>WT and Triple<sup>SMAD4</sup>WT primary tumors. Dashed lines highlight tumor edges. T=tumor; Ht= healthy tissue. Scale bars 500μm. **(B)** P21 staining of a Triple<sup>P53</sup>WT primary tumor. Arrowheads point to P21 positive cells. Scale bar 100 μm. **(C)** CK7/8 staining of Triple<sup>SMAD4</sup>WT and Quadruple primary tumors obtained from two independent donors. Scale bars 100 μm.

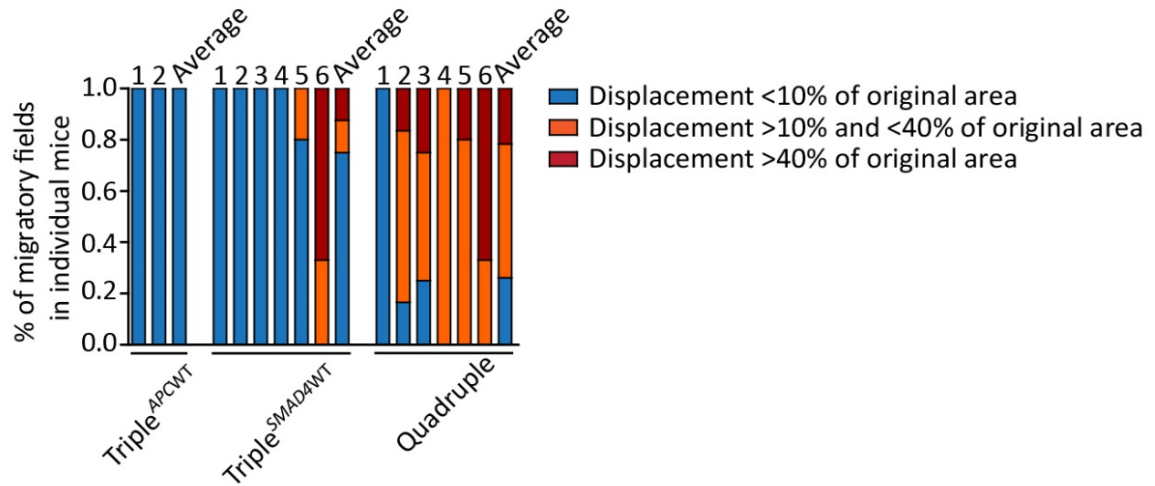

**Figure S5.** Classification of the migratory behavior of the different imaging fields in individual mice per each condition. See Figure 3C for the quantification.

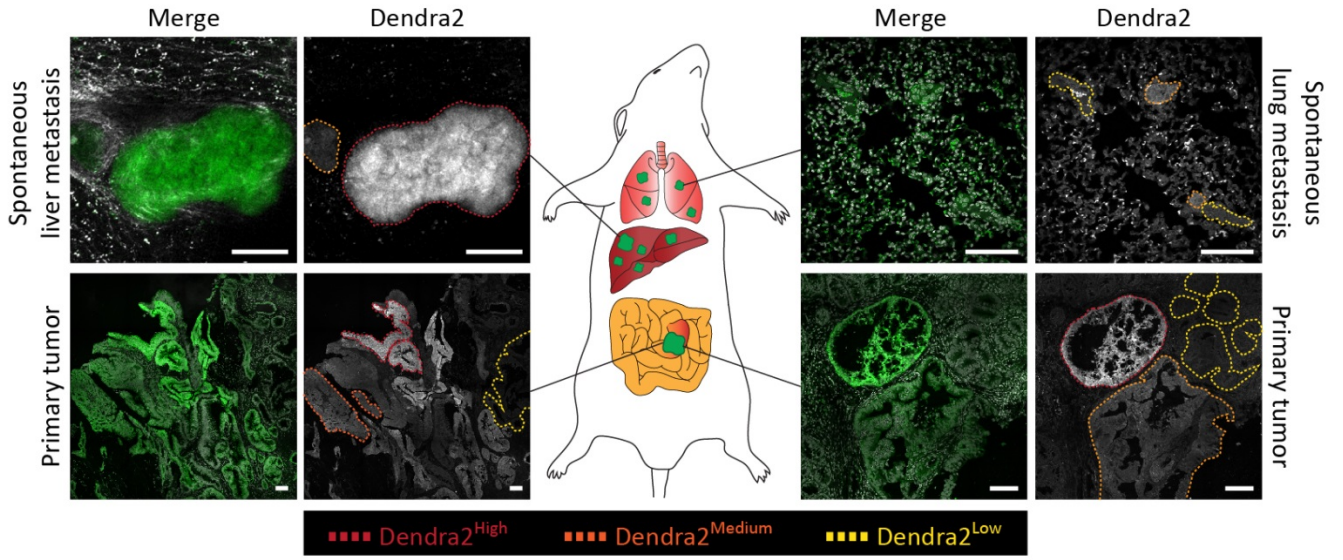

**Figure S6.** Clonal characterization of primary tumors and corresponding spontaneous metastases. Examples of confocal images of primary tumors and corresponding metastases originated from different clones present in the primary tumor. Representative clones with either high, medium or low expression level of Dendra2 are highlighted in red, orange and yellow respectively. Scale bars 100  $\mu\text{m}$ .

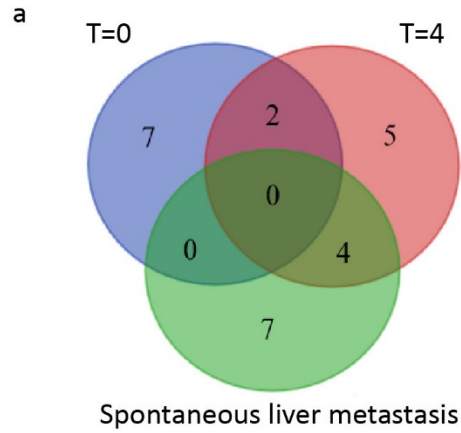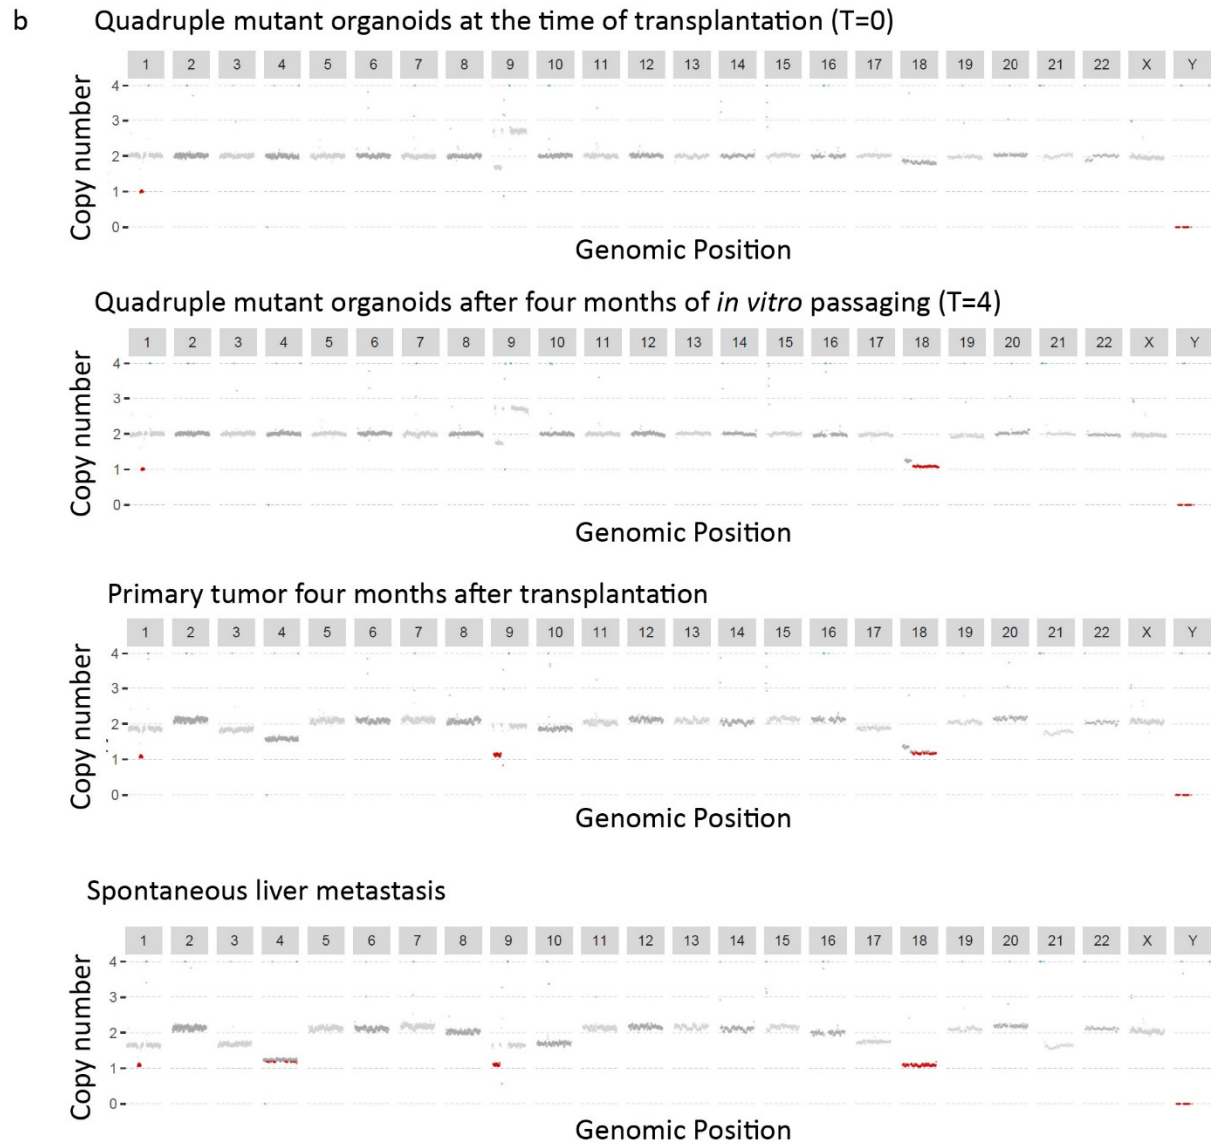

**Figure S7.** Mutation load analysis. Whole genome sequence analysis of quadruple mutant culture at the time it was transplanted, after it was kept in culture for 4 months and of a resulting spontaneous metastasis. **(A)** Venn diagram showing that many mutations are shared between the different samples, suggesting a common cause. **(B)** Each data point represents the GC corrected median copy number per 500 kb plotted over the genome with alternating colors per chromosome. Red regions indicate deleted regions and blue regions gains as detected by FREEC.

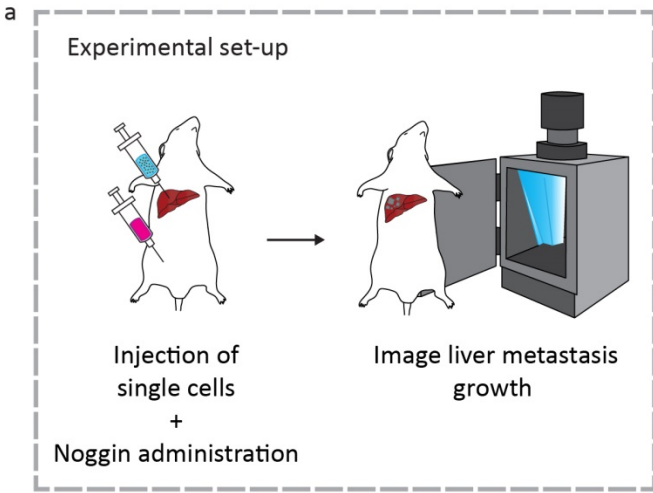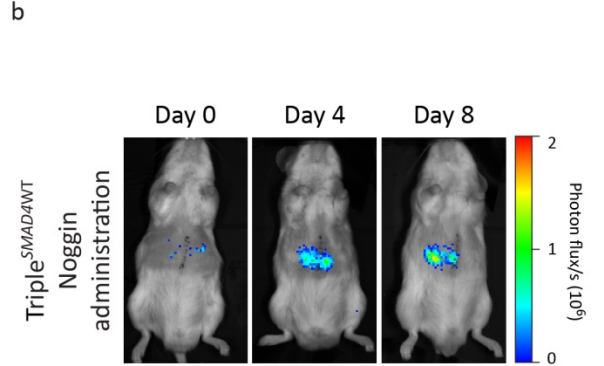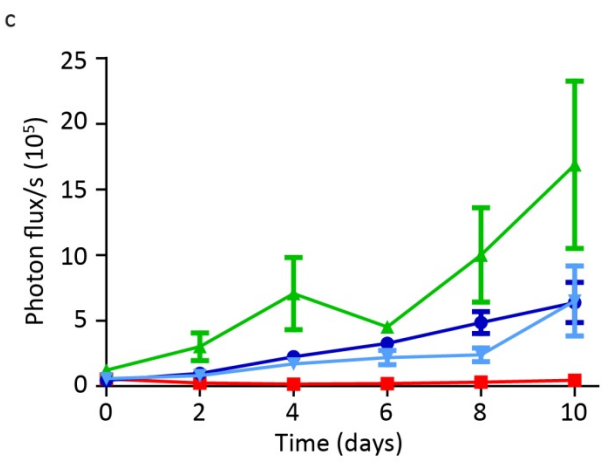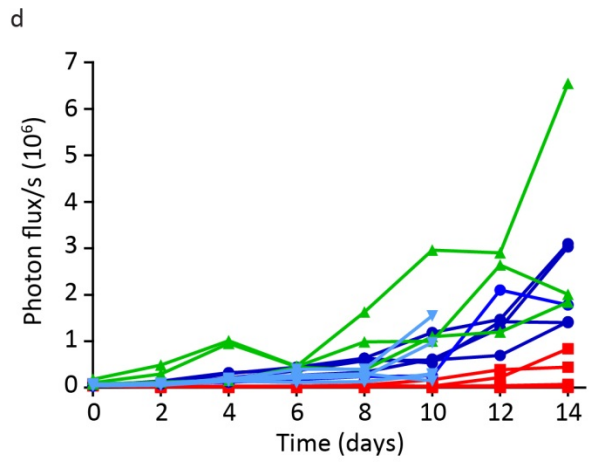

▲ Quadruple    ● Triple<sup>SMAD4WT</sup> + Noggin overexpression  
■ Triple<sup>SMAD4WT</sup>    ▼ Triple<sup>SMAD4WT</sup> + Noggin administration



**Figure S8.** Metastatic growth upon reconstitution of the niche in individual mice.

**(A)** Mutant human colon organoids were dissociated and subsequently 50,000 cells were intrahepatically injected in mice. The niche was reconstituted by intraperitoneal injection of Noggin. Tumor growth was monitored by bioluminescence. **(B)** Representative images at indicated timepoints. **(C)** The kinetics of metastatic growth. Points are averages and error bars indicate SEM of biological replicates. Quadruple N=3, Triple<sup>SMAD4<sup>WT</sup></sup>, Triple<sup>SMAD4<sup>WT</sup></sup> overexpressing Noggin N=5 and Triple<sup>SMAD4<sup>WT</sup></sup> injected with Noggin N=5. **(D)** Kinetics of metastatic growth in individual mice of Figure 5 and S8B are shown.

a

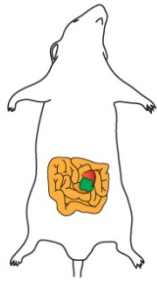

Tumor growth

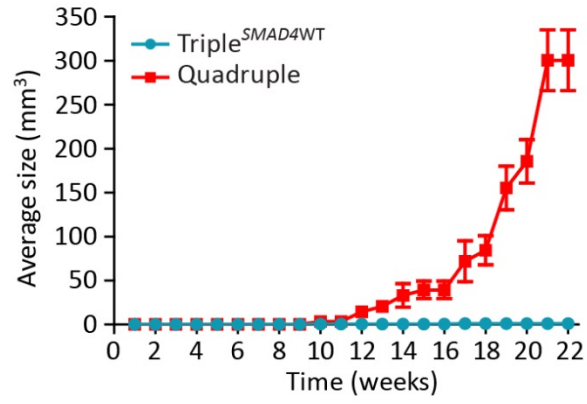

b

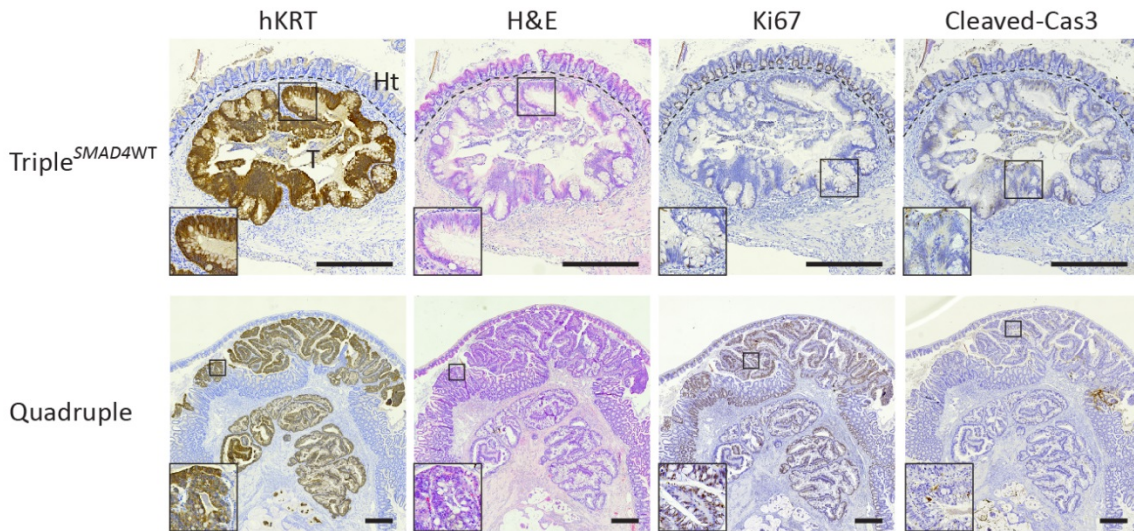

c

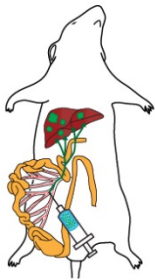

Metastatic capacity

|                           | Mice with metastasis | Total number of metastasis | Metastatic load (mm <sup>2</sup> ) |
|---------------------------|----------------------|----------------------------|------------------------------------|
| Triple <sup>SMAD4WT</sup> | 0% (0/3)             | 0                          | -                                  |
| Quadruple                 | 67% (2/3)            | 3                          | 3.36 E-01                          |

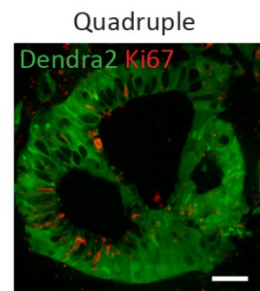

**Figure S9.** Validation of results in a second independent human colon organoid line. **(A)** Triple<sup>SMAD4<sup>WT</sup></sup> and quadruple mutation combinations were introduced in a second independent human colon organoid line and orthotopically transplanted. Graph represents the average tumor growth *in vivo*. Tumor volume was measured weekly by palpation. Error bars indicate the SEM of biological replicates. **(B)** Human-specific cytokeratin, H&E, Ki-67 and cleaved caspase-3 immunostainings on tumors isolated from mice transplanted with the indicated mutant human colon organoids. Scale bars 500  $\mu\text{m}$ . **(C)** Mutant human colon organoids were dissociated and 250,000 cells were subsequently injected into a mesenteric vein of immune-deficient mice. After 6 weeks, livers were analyzed for the presence of metastases. Left, graph representing the number of formed metastases. Right, representative image of a quadruple mutant metastasis (green) stained for Ki67 staining (red). Scale bar 50  $\mu\text{m}$ .

## Supplemental References

Drost, J., van Jaarsveld, R. H., Ponsioen, B., Zimmerlin, C., van Boxtel, R., Buijs, A., Sachs, N., Overmeer, R. M., Offerhaus, G. J., Begthel, H., *et al.* (2015). Sequential cancer mutations in cultured human intestinal stem cells. *Nature* 521, 43-47.
